# Supplementary material for: Transcriptome and Metabolome Analysis Reveals Salt-Tolerance Pathways in the Leaves and Roots of ZM-4 (Malus zumi) in the Early Stages of Salt Stress
Source: MDPI journal article supplement (doi:10.3390/ijms24043638), 2023-02-11
Supplement: s1 [file s1]

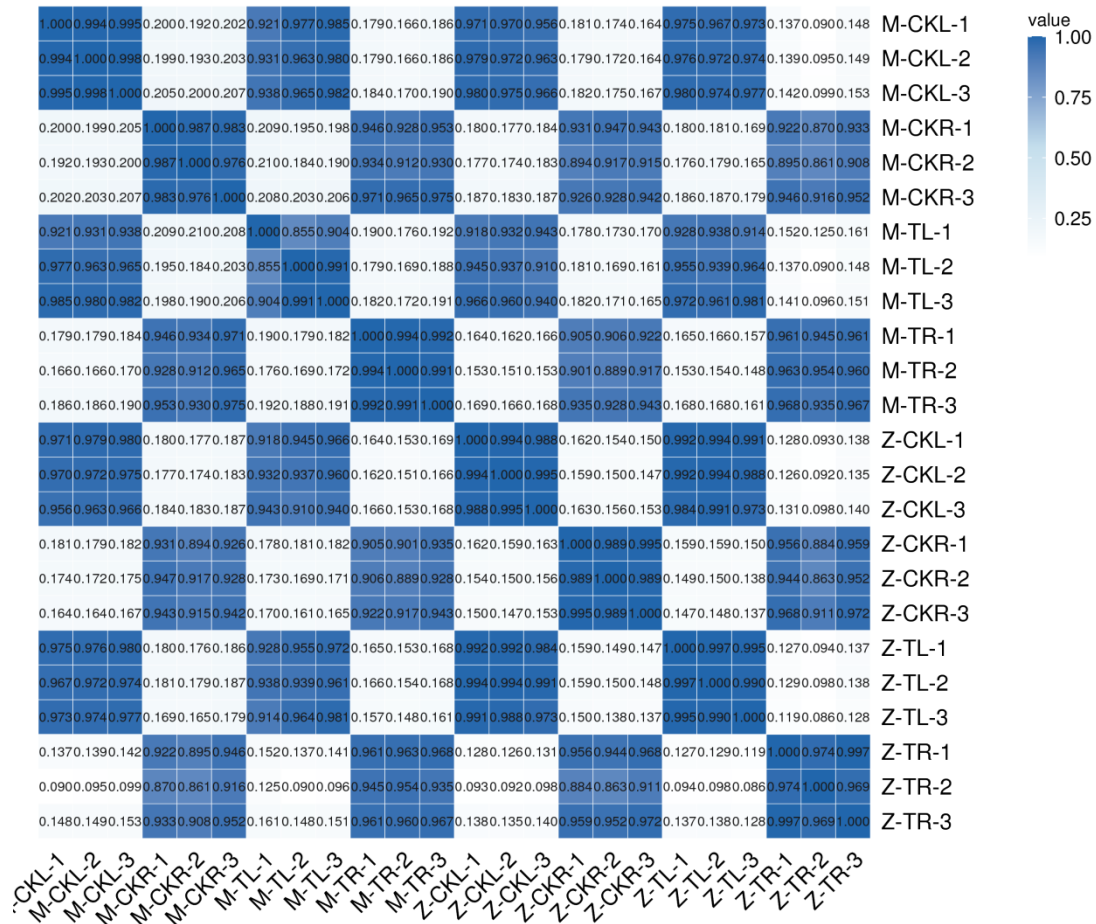

**Figure S1** Heatmap of Pearson's correlation coefficient between replicates of samples

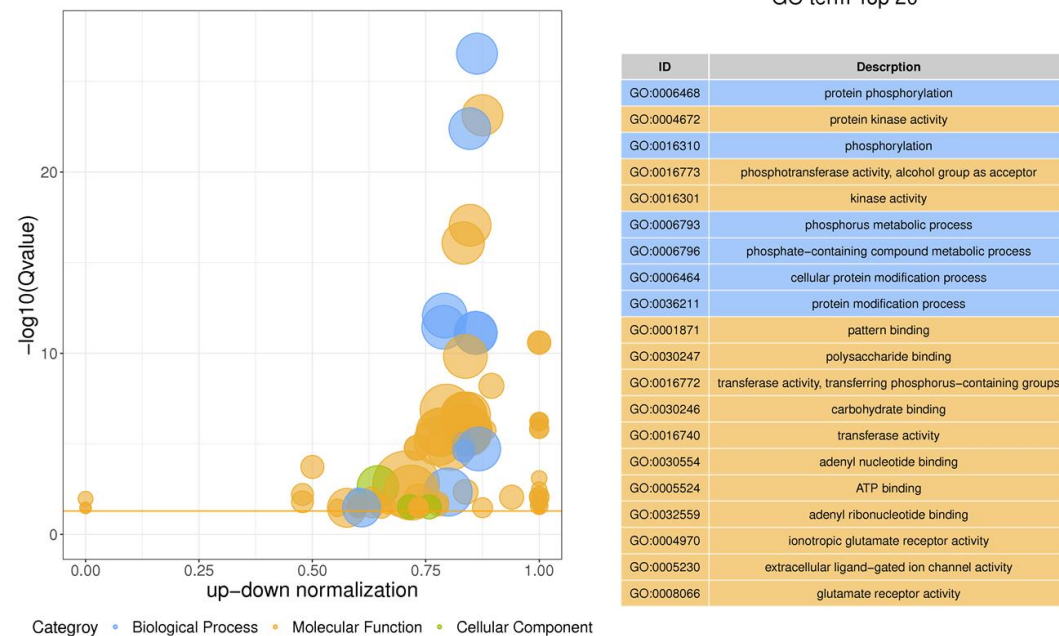

**Figure S2** The top 20 GO terms of DEGs in M-CKL vs M-TL

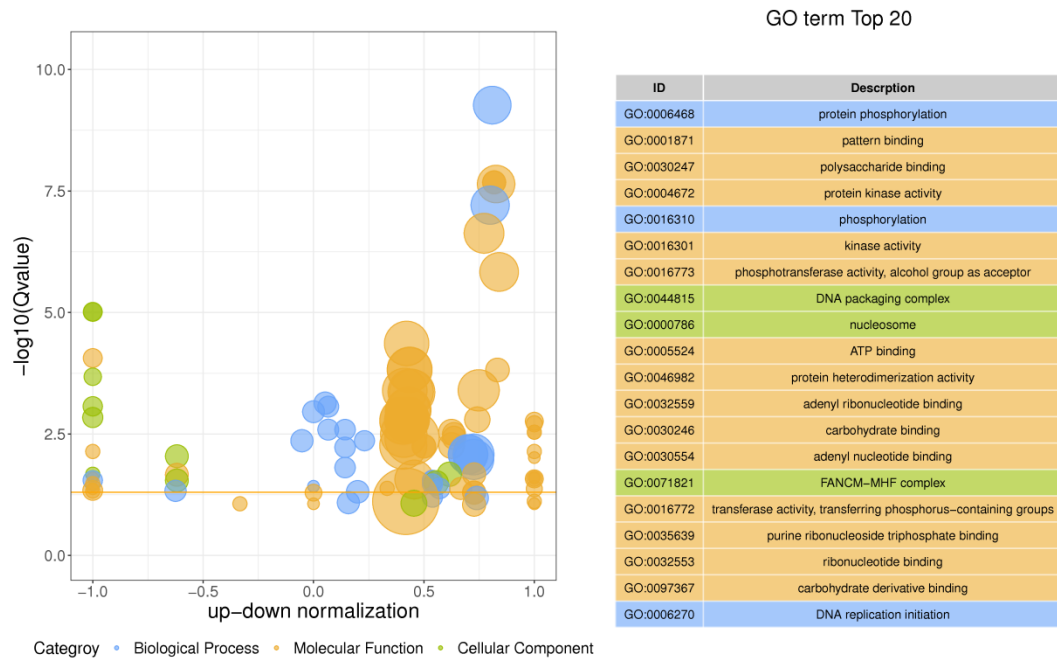

**Figure S3** The top 20 GO terms of DEGs in Z-CKL vs Z-TL

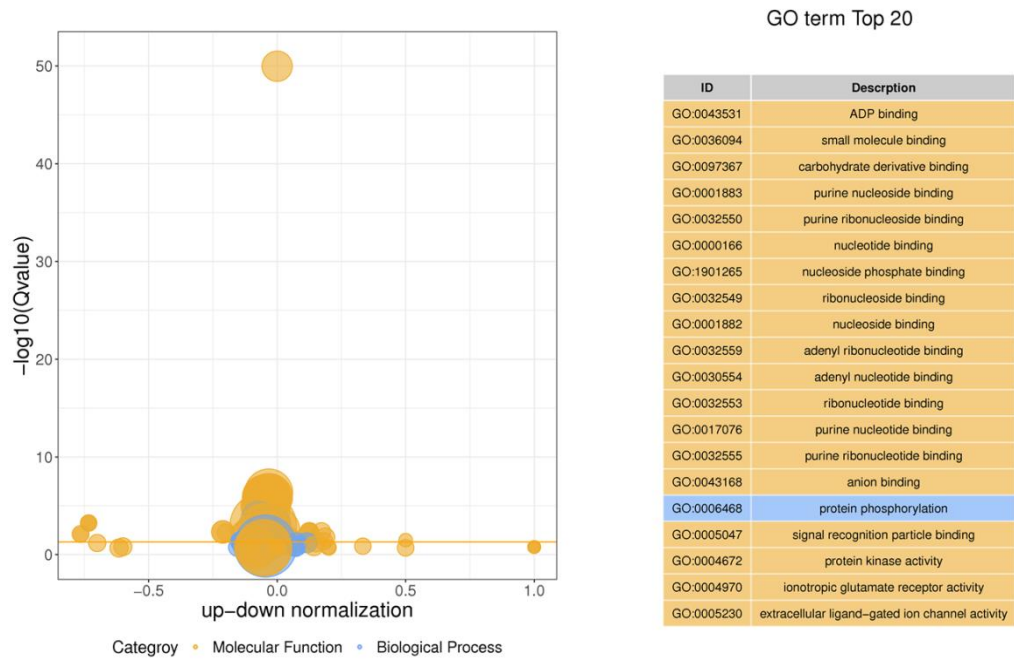

**Figure S4** The top 20 GO terms of DEGs in M-TL vs Z-TL

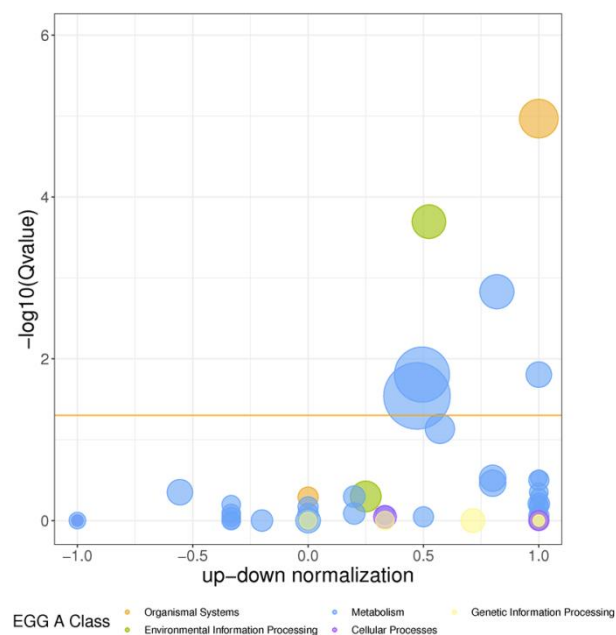

Pathway Top 20

| ID      | Description                                            |
|---------|--------------------------------------------------------|
| ko04626 | Plant-pathogen interaction                             |
| ko04016 | MAPK signaling pathway – plant                         |
| ko00940 | Phenylpropanoid biosynthesis                           |
| ko00052 | Galactose metabolism                                   |
| ko01110 | Biosynthesis of secondary metabolites                  |
| ko01100 | Metabolic pathways                                     |
| ko00500 | Starch and sucrose metabolism                          |
| ko00480 | Glutathione metabolism                                 |
| ko00072 | Synthesis and degradation of ketone bodies             |
| ko00905 | Brassinosteroid biosynthesis                           |
| ko00520 | Amino sugar and nucleotide sugar metabolism            |
| ko00040 | Pentose and glucuronate interconversions               |
| ko00650 | Butanoate metabolism                                   |
| ko04075 | Plant hormone signal transduction                      |
| ko00350 | Tyrosine metabolism                                    |
| ko00902 | Monoterpenoid biosynthesis                             |
| ko04712 | Circadian rhythm – plant                               |
| ko00250 | Alanine, aspartate and glutamate metabolism            |
| ko00950 | Isoquinoline alkaloid biosynthesis                     |
| ko00960 | Tropane, piperidine and pyridine alkaloid biosynthesis |

**Figure S5** The top 20 KEGG pathways of DEGs in M-CKL vs M-TL

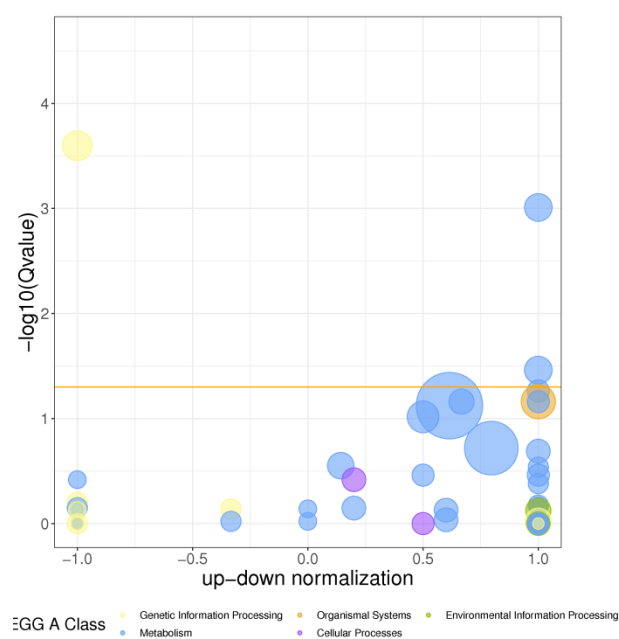

Pathway Top 20

| ID      | Description                                   |
|---------|-----------------------------------------------|
| ko03030 | DNA replication                               |
| ko00909 | Sesquiterpenoid and triterpenoid biosynthesis |
| ko00592 | alpha-Linolenic acid metabolism               |
| ko00591 | Linoleic acid metabolism                      |
| ko04626 | Plant-pathogen interaction                    |
| ko00052 | Galactose metabolism                          |
| ko00904 | Diterpenoid biosynthesis                      |
| ko01100 | Metabolic pathways                            |
| ko00940 | Phenylpropanoid biosynthesis                  |
| ko01110 | Biosynthesis of secondary metabolites         |
| ko00941 | Flavonoid biosynthesis                        |
| ko00480 | Glutathione metabolism                        |
| ko00950 | Isoquinoline alkaloid biosynthesis            |
| ko00053 | Ascorbate and aldarate metabolism             |
| ko00350 | Tyrosine metabolism                           |
| ko04145 | Phagosome                                     |
| ko00908 | Zeatin biosynthesis                           |
| ko00906 | Carotenoid biosynthesis                       |
| ko03440 | Homologous recombination                      |
| ko00072 | Synthesis and degradation of ketone bodies    |

**Figure S6** The top 20 KEGG pathways of DEGs in Z-CKL vs Z-TL

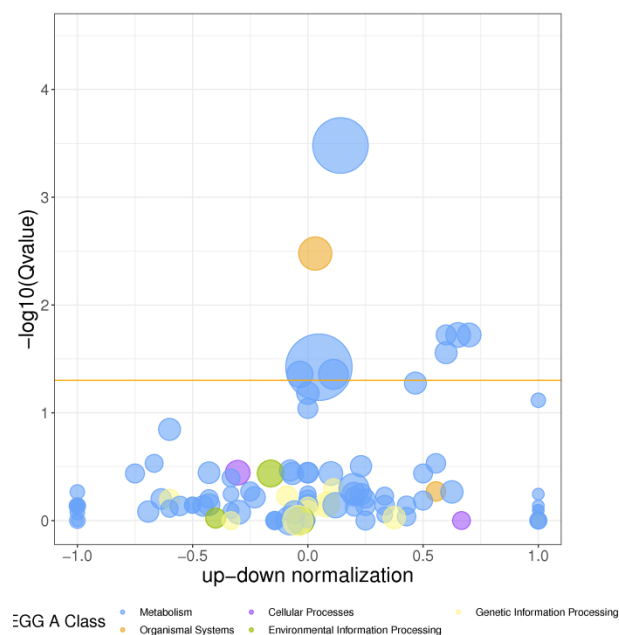

Pathway Top 20

| ID      | Description                                           |
|---------|-------------------------------------------------------|
| ko01110 | Biosynthesis of secondary metabolites                 |
| ko04626 | Plant-pathogen interaction                            |
| ko00941 | Flavonoid biosynthesis                                |
| ko00592 | alpha-Linolenic acid metabolism                       |
| ko00591 | Linoleic acid metabolism                              |
| ko00909 | Sesquiterpenoid and triterpenoid biosynthesis         |
| ko01100 | Metabolic pathways                                    |
| ko00480 | Glutathione metabolism                                |
| ko00940 | Phenylpropanoid biosynthesis                          |
| ko00130 | Ubiquinone and other terpenoid-quinone biosynthesis   |
| ko00350 | Tyrosine metabolism                                   |
| ko00254 | Aflatoxin biosynthesis                                |
| ko00950 | Isoquinoline alkaloid biosynthesis                    |
| ko00380 | Tryptophan metabolism                                 |
| ko00945 | Stilbenoid, diarylheptanoid and gingerol biosynthesis |
| ko00908 | Zeatin biosynthesis                                   |
| ko00400 | Phenylalanine, tyrosine and tryptophan biosynthesis   |
| ko00053 | Ascorbate and aldarate metabolism                     |
| ko00360 | Phenylalanine metabolism                              |
| ko04146 | Peroxisome                                            |

**Figure S7** The top 20 KEGG pathways of DEGs in M-TL vs Z-TL

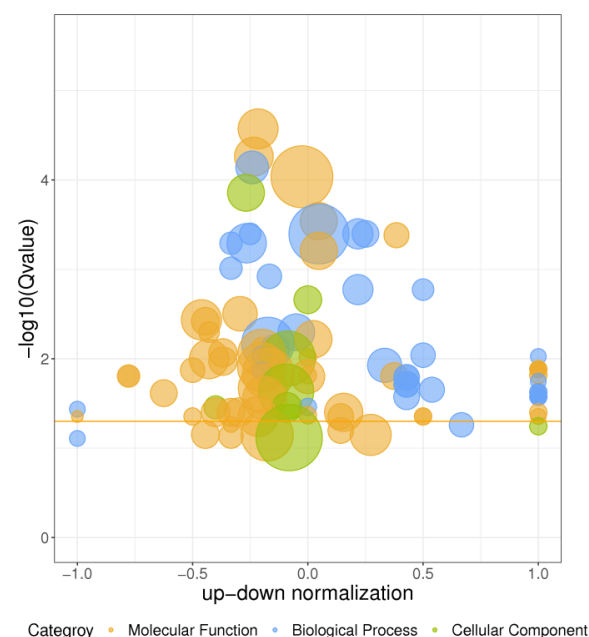

GO term Top 20

| ID         | Description                                          |
|------------|------------------------------------------------------|
| GO:0016798 | hydrolase activity, acting on glycosyl bonds         |
| GO:0004553 | hydrolase activity, hydrolyzing O-glycosyl compounds |
| GO:0000272 | polysaccharide catabolic process                     |
| GO:0016491 | oxidoreductase activity                              |
| GO:0005576 | extracellular region                                 |
| GO:0020037 | heme binding                                         |
| GO:0042545 | cell wall modification                               |
| GO:0045490 | pectin catabolic process                             |
| GO:0071555 | cell wall organization                               |
| GO:0055114 | oxidation-reduction process                          |
| GO:0030599 | pectinesterase activity                              |
| GO:0045488 | pectin metabolic process                             |
| GO:0005976 | polysaccharide metabolic process                     |
| GO:0046906 | tetrapyrrole binding                                 |
| GO:0010393 | galacturonan metabolic process                       |
| GO:0042737 | drug catabolic process                               |
| GO:0045229 | external encapsulating structure organization        |
| GO:0034754 | cellular hormone metabolic process                   |
| GO:0005618 | cell wall                                            |
| GO:0015291 | secondary active transmembrane transporter activity  |

**Figure S8** The top 20 GO terms of DEGs in M-CKR vs M-TR

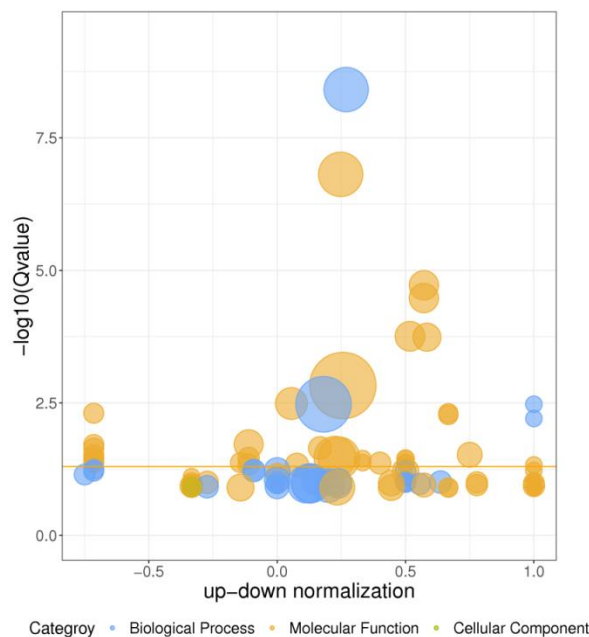

GO term Top 20

| ID         | Description                                                                                           |
|------------|-------------------------------------------------------------------------------------------------------|
| GO:0055114 | oxidation-reduction process                                                                           |
| GO:0016491 | oxidoreductase activity                                                                               |
| GO:0020037 | heme binding                                                                                          |
| GO:0046906 | tetrapyrrole binding                                                                                  |
| GO:0016705 | oxidoreductase activity, acting on paired donors, with incorporation or reduction of molecular oxygen |
| GO:0005506 | iron ion binding                                                                                      |
| GO:0003824 | catalytic activity                                                                                    |
| GO:0048037 | cofactor binding                                                                                      |
| GO:0044710 | single-organism metabolic process                                                                     |
| GO:0030212 | hyaluronan metabolic process                                                                          |
| GO:0048472 | threonine-phosphate decarboxylase activity                                                            |
| GO:0018467 | formaldehyde dehydrogenase activity                                                                   |
| GO:0004400 | histidinol-phosphate transaminase activity                                                            |
| GO:1903510 | mucopolysaccharide metabolic process                                                                  |
| GO:0050662 | coenzyme binding                                                                                      |
| GO:0051903 | S-(hydroxymethyl)glutathione dehydrogenase activity                                                   |
| GO:0050607 | mycothiol-dependent formaldehyde dehydrogenase activity                                               |
| GO:0016701 | oxidoreductase activity, acting on single donors with incorporation of molecular oxygen               |
| GO:0004029 | aldehyde dehydrogenase (NAD) activity                                                                 |
| GO:0008194 | UDP-glycosyltransferase activity                                                                      |

**Figure S9** The top 20 GO terms of DEGs in Z-CKR vs Z-TR

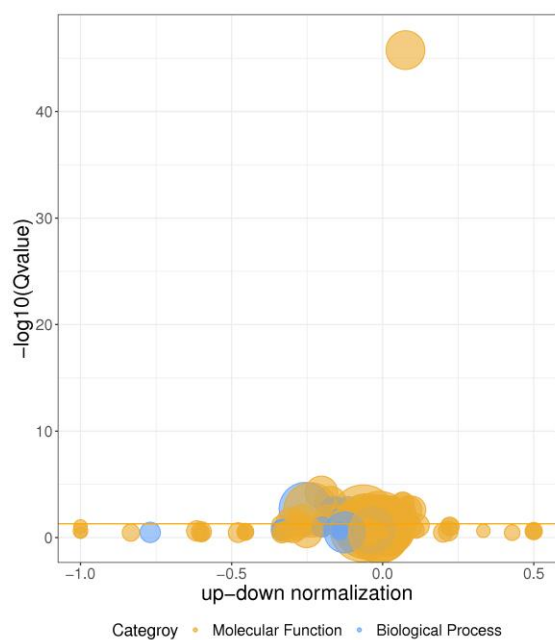

GO term Top 20

| ID         | Description                                                                         |
|------------|-------------------------------------------------------------------------------------|
| GO:0043531 | ADP binding                                                                         |
| GO:0046906 | tetrapyrrole binding                                                                |
| GO:0020037 | heme binding                                                                        |
| GO:0001871 | pattern binding                                                                     |
| GO:0030247 | polysaccharide binding                                                              |
| GO:0055114 | oxidation-reduction process                                                         |
| GO:0048544 | recognition of pollen                                                               |
| GO:0009875 | pollen-pistil interaction                                                           |
| GO:0009856 | pollination                                                                         |
| GO:0044706 | multi-multicellular organism process                                                |
| GO:0008037 | cell recognition                                                                    |
| GO:0016491 | oxidoreductase activity                                                             |
| GO:0022838 | substrate-specific channel activity                                                 |
| GO:0005216 | ion channel activity                                                                |
| GO:0015333 | peptide:proton symporter activity                                                   |
| GO:0022897 | proton-dependent peptide secondary active transmembrane transporter activity        |
| GO:0015267 | channel activity                                                                    |
| GO:0022803 | passive transmembrane transporter activity                                          |
| GO:0008194 | UDP-glycosyltransferase activity                                                    |
| GO:0016655 | oxidoreductase activity, acting on NAD(P)H, quinone or similar compound as acceptor |

**Figure S10** The top 20 GO terms of DEGs in M-TR vs Z-TR

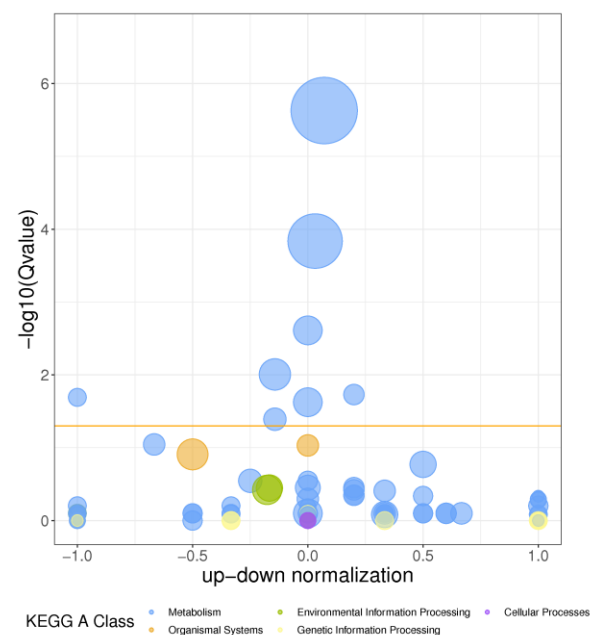

Pathway Top 20

| ID      | Description                                   |
|---------|-----------------------------------------------|
| ko01100 | Metabolic pathways                            |
| ko01110 | Biosynthesis of secondary metabolites         |
| ko00040 | Pentose and glucuronate interconversions      |
| ko00940 | Phenylpropanoid biosynthesis                  |
| ko00908 | Zeatin biosynthesis                           |
| ko00944 | Flavone and flavonol biosynthesis             |
| ko00500 | Starch and sucrose metabolism                 |
| ko00909 | Sesquiterpenoid and triterpenoid biosynthesis |
| ko00906 | Carotenoid biosynthesis                       |
| ko04712 | Circadian rhythm – plant                      |
| ko04626 | Plant–pathogen interaction                    |
| ko00010 | Glycolysis / Gluconeogenesis                  |
| ko00905 | Brassinosteroid biosynthesis                  |
| ko00710 | Carbon fixation in photosynthetic organisms   |
| ko00640 | Propanoate metabolism                         |
| ko00520 | Amino sugar and nucleotide sugar metabolism   |
| ko04016 | MAPK signaling pathway – plant                |
| ko04075 | Plant hormone signal transduction             |
| ko00100 | Steroid biosynthesis                          |
| ko00330 | Arginine and proline metabolism               |

**Figure S11** The top 20 KEGG pathways of DEGs in M-CKR vs M-TR

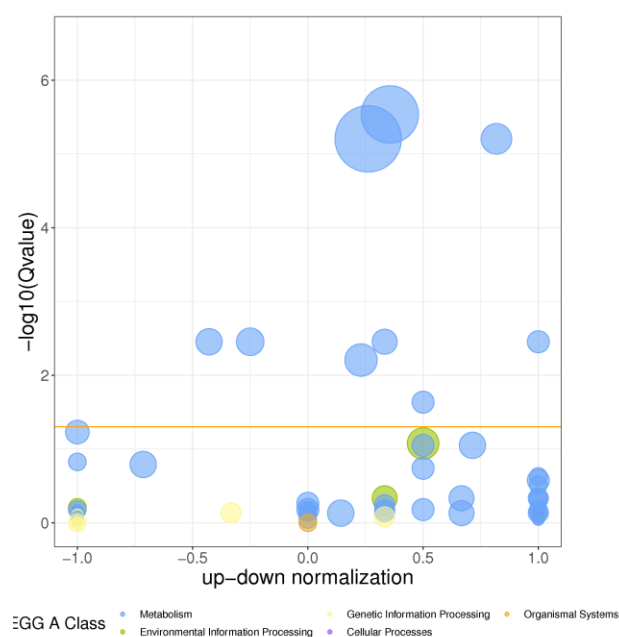

Pathway Top 20

| ID      | Description                                   |
|---------|-----------------------------------------------|
| ko01110 | Biosynthesis of secondary metabolites         |
| ko01100 | Metabolic pathways                            |
| ko00460 | Cyanoamino acid metabolism                    |
| ko00350 | Tyrosine metabolism                           |
| ko00910 | Nitrogen metabolism                           |
| ko00966 | Glucosinolate biosynthesis                    |
| ko00592 | alpha-Linolenic acid metabolism               |
| ko00940 | Phenylpropanoid biosynthesis                  |
| ko00904 | Diterpenoid biosynthesis                      |
| ko00071 | Fatty acid degradation                        |
| ko04075 | Plant hormone signal transduction             |
| ko00270 | Cysteine and methionine metabolism            |
| ko00909 | Sesquiterpenoid and triterpenoid biosynthesis |
| ko00531 | Glycosaminoglycan degradation                 |
| ko00010 | Glycolysis / Gluconeogenesis                  |
| ko00052 | Galactose metabolism                          |
| ko00908 | Zeatin biosynthesis                           |
| ko01210 | 2-Oxocarboxylic acid metabolism               |
| ko00591 | Linoleic acid metabolism                      |
| ko00500 | Starch and sucrose metabolism                 |

**Figure S12** The top 20 KEGG pathways of DEGs in Z-CKR vs Z-TR



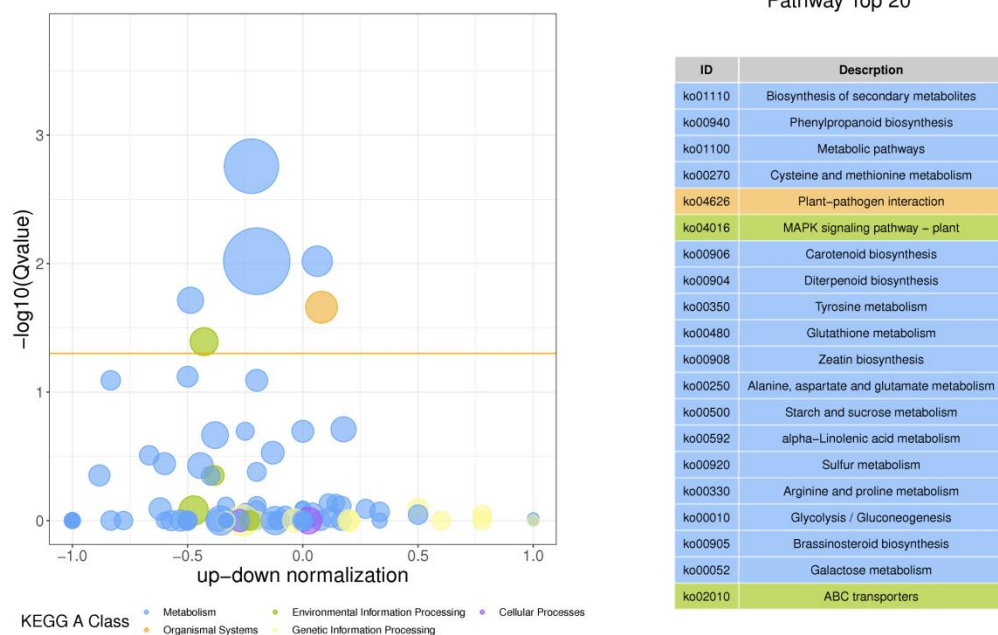

**Figure S13** The top 20 KEGG pathways of DEGs in M-TR vs Z-TR

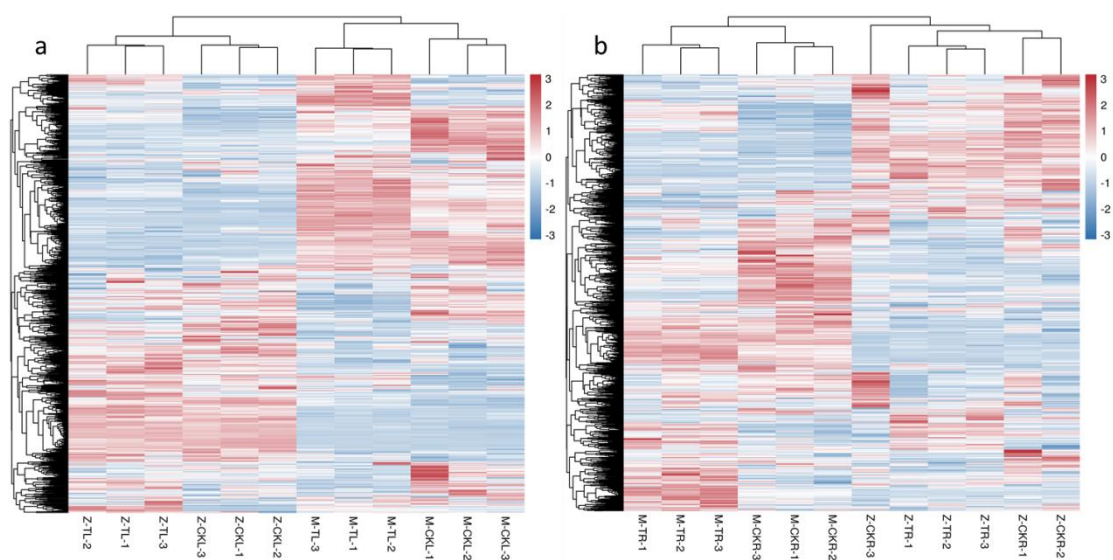

**Figure S14** Heatmap of metabolites of leaves and roots in ZM-4 and M9T337 under salt stress. (a) Heatmap of metabolites of leaves in ZM-4 and M9T337 under salt stress. (b) Heatmap of metabolites of roots in ZM-4 and M9T337 under salt stress.

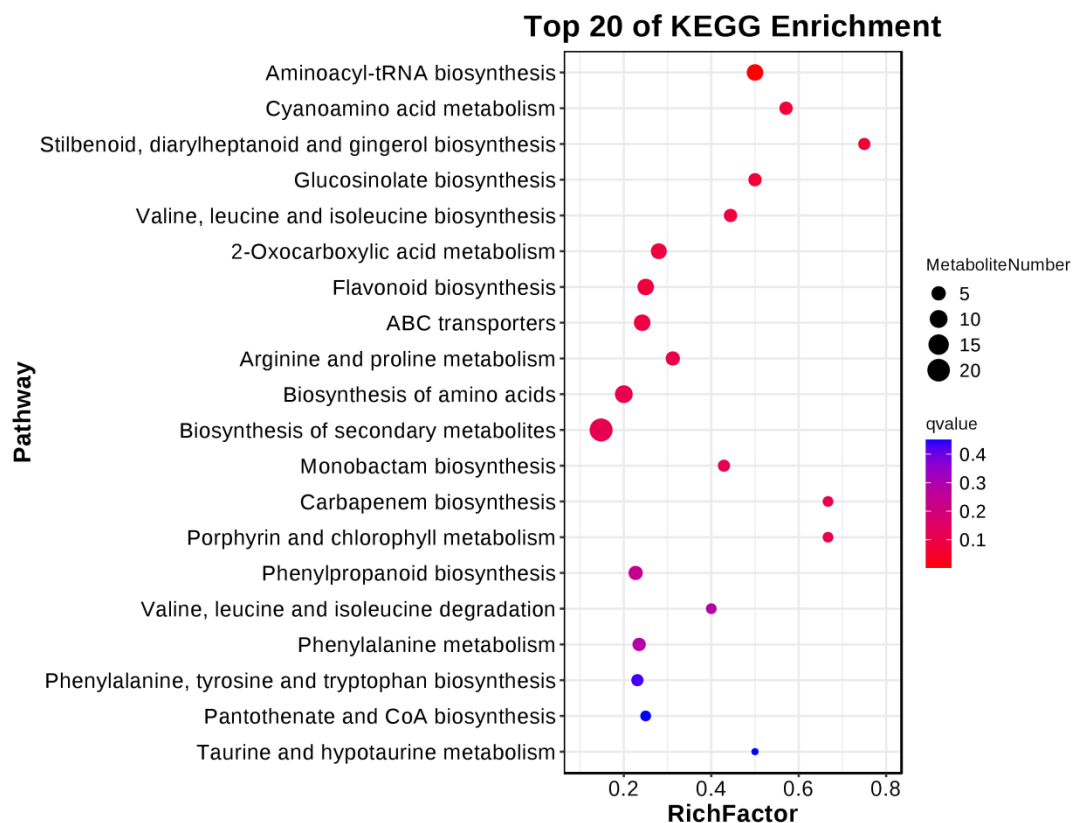

**Figure S15** The top 20 KEGG pathways of DAMs in M-CKL vs M-TL

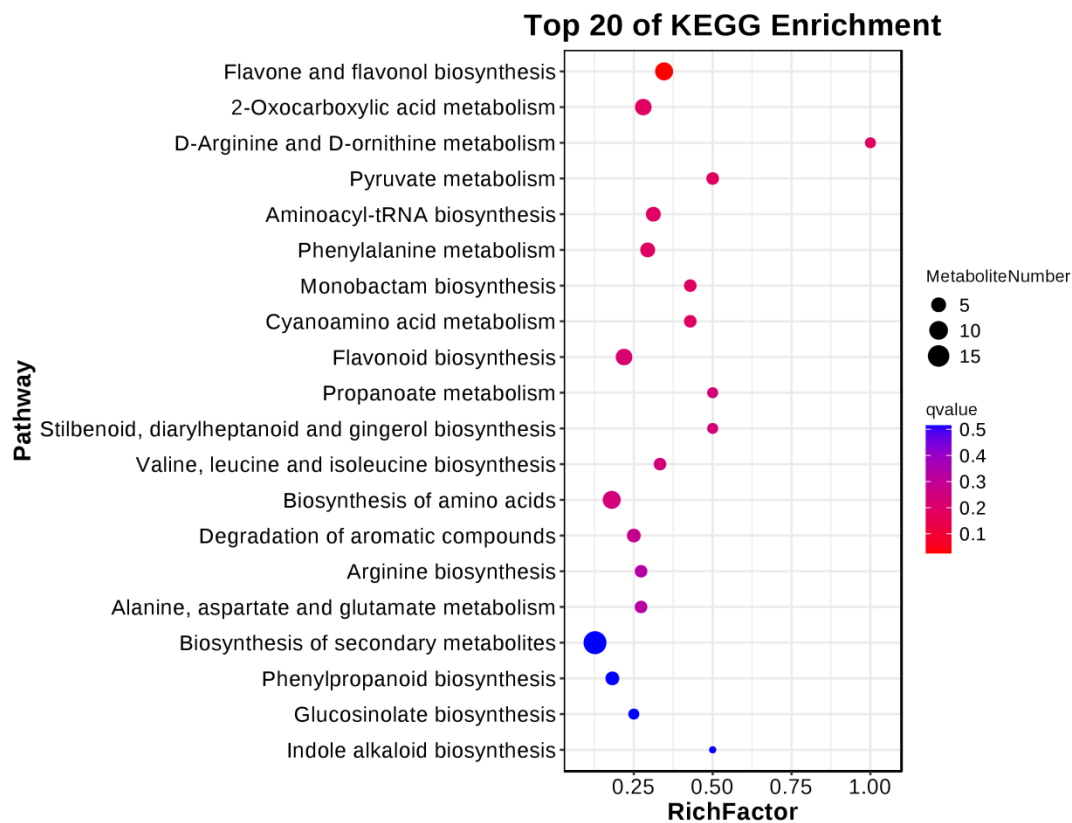

**Figure S16** The top 20 KEGG pathways of DAMs in Z-CKL vs Z-TL



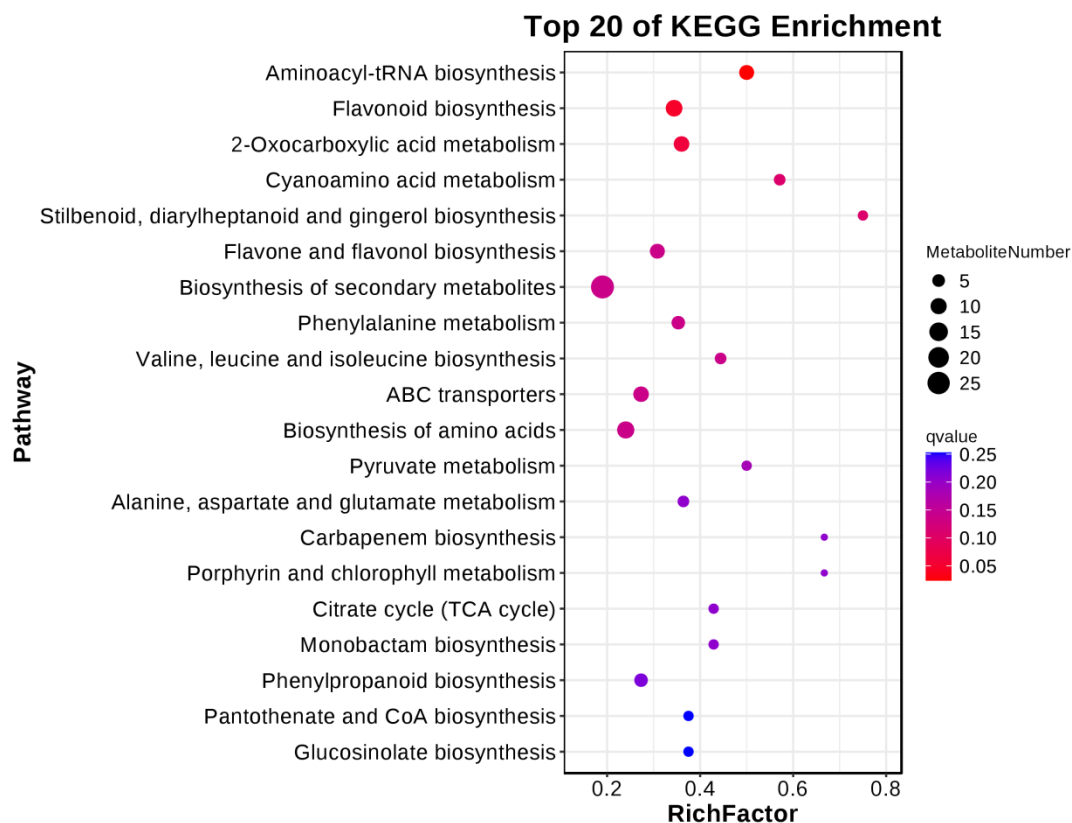

**Figure S17** The top 20 KEGG pathways of DAMs in M-TL vs Z-TL

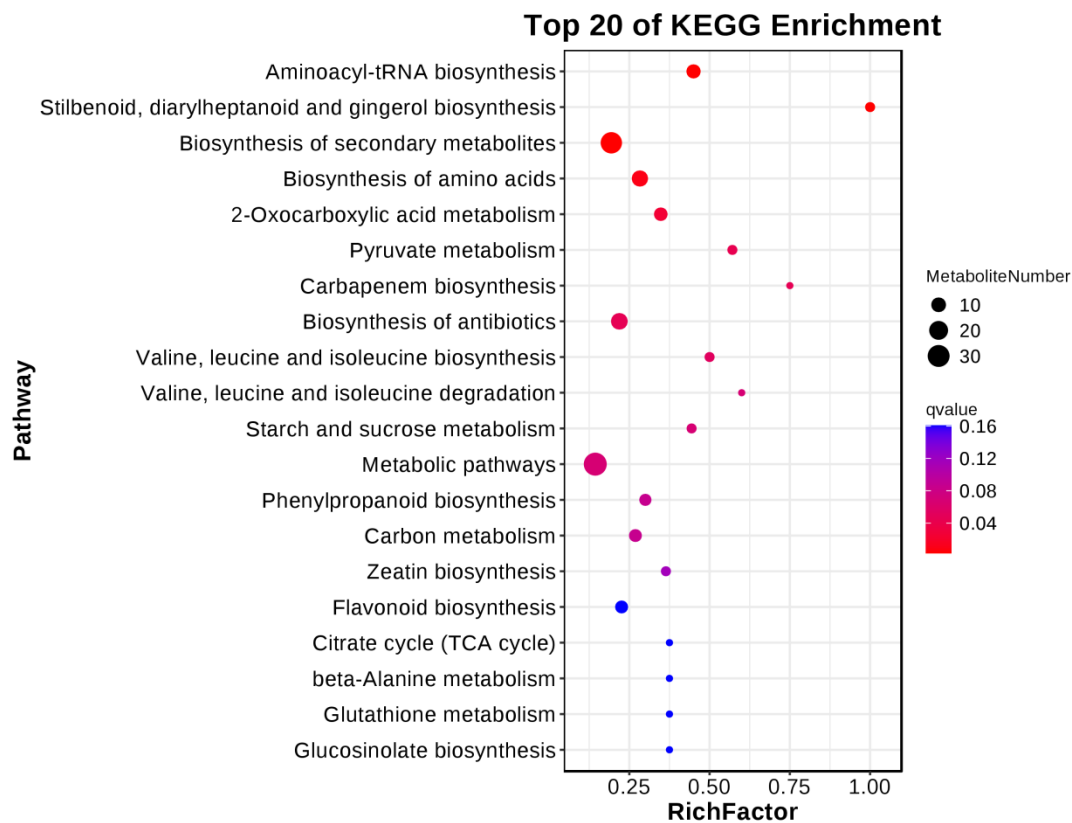

**Figure S18** The top 20 KEGG pathways of DAMs in M-CKR vs M-TR

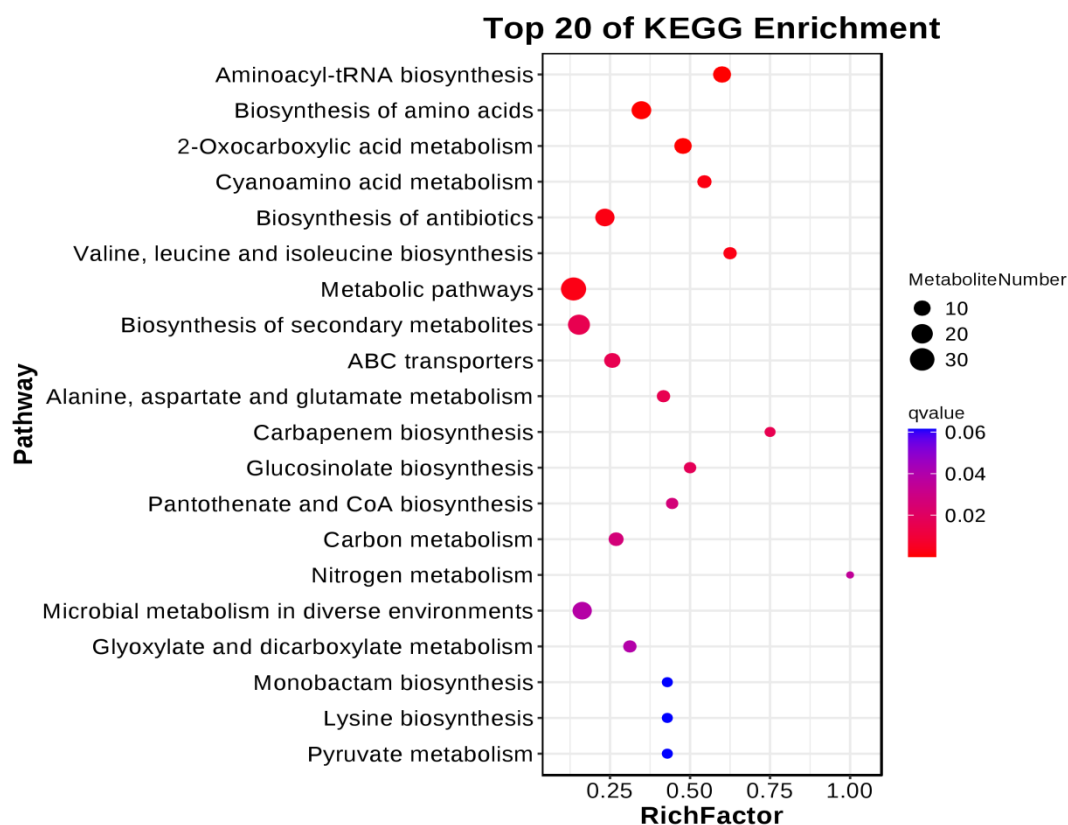

**Figure S19** The top 20 KEGG pathways of DAMs in Z-CKR vs Z-TR

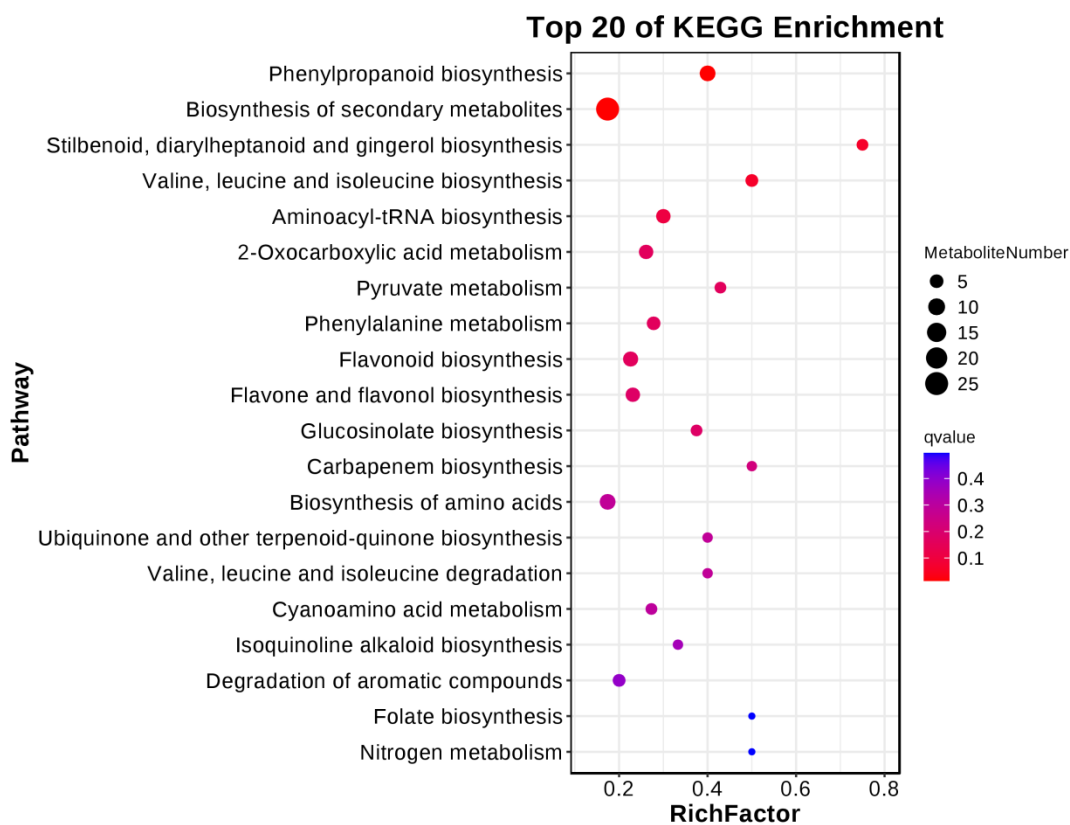

**Figure S20** The top 20 KEGG pathways of DAMs in M-TR vs Z-TR

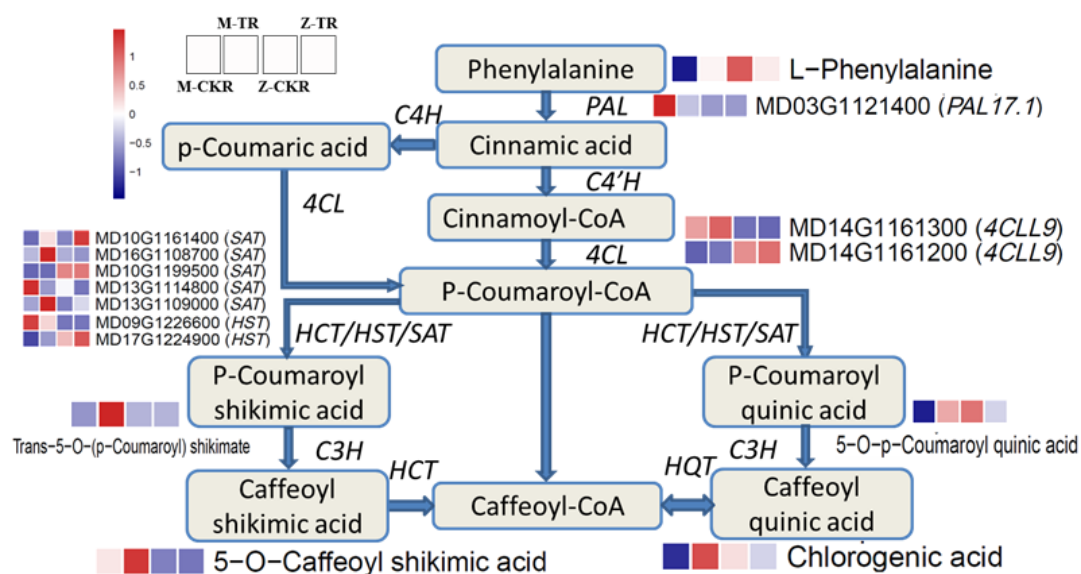

**Figure S21** The main salt resistance genes and metabolites in phenylpropanoid biosynthesis pathway (PAL, phenylalanine ammonia-lyase; C4'H, cinnamate-4'-hydroxylase; C4H, cinnamate-4-hydroxylase; 4CL, 4-Coumarate:coenzyme A ligase; HCT/HAT/SAT, Shikimate/Quinate Hydroxycinnamoyltransferase; C3H, p-coumaroyl shikimate 3-hydroxylase; HQT, hydroxycinnamoyl CoA quinate hydroxycinnamoyl transferase).
